# Supplementary material
Source: PubMed Central journal article supplement (PMC5039384)

H&E

KI67

HER-2

A

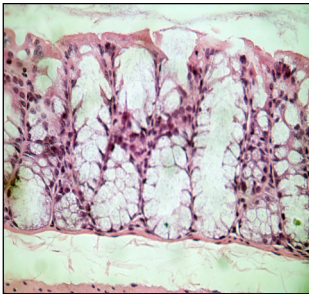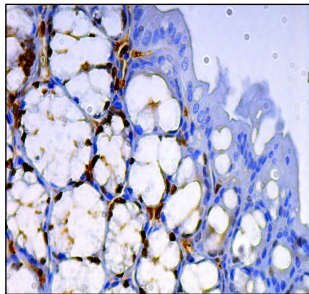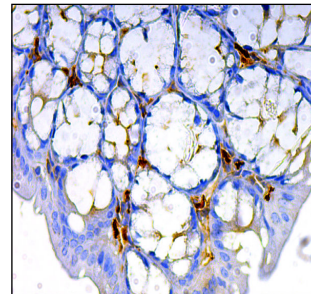

B

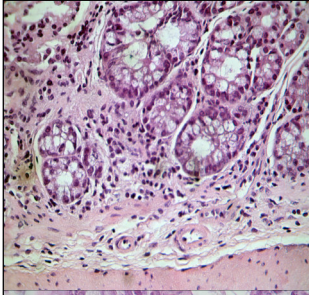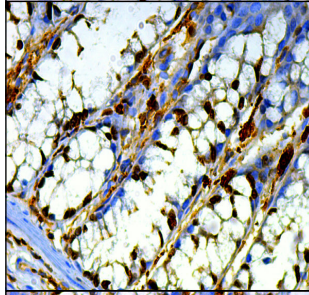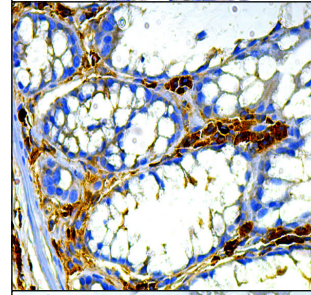

C

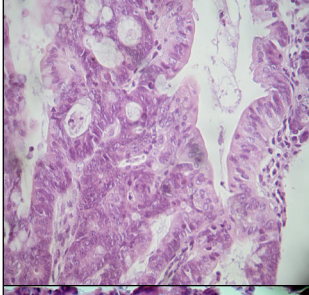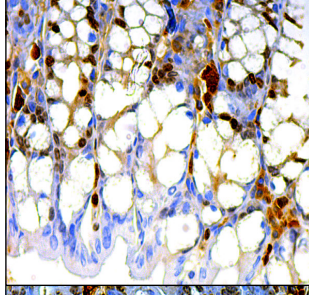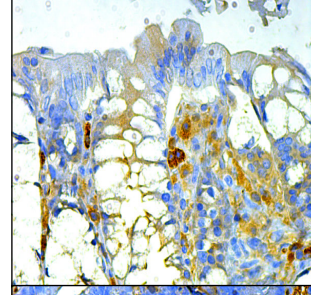

D

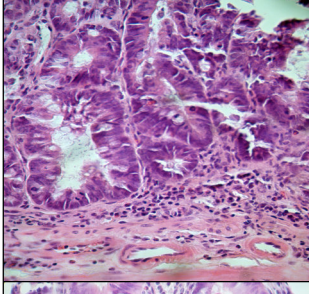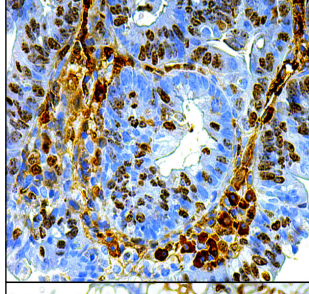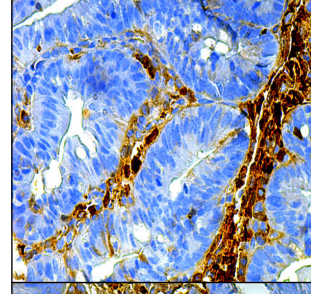

E

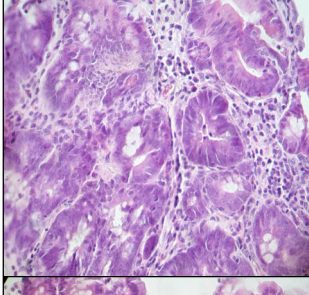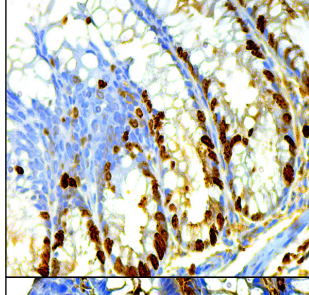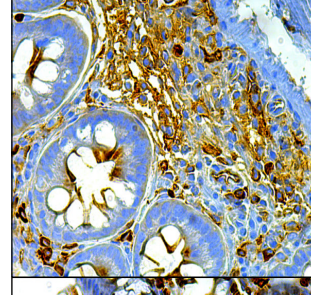

F

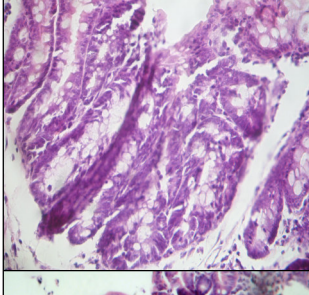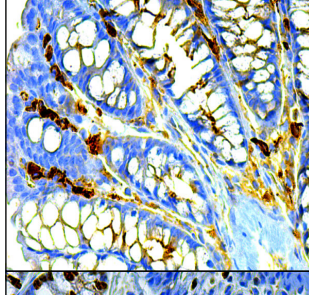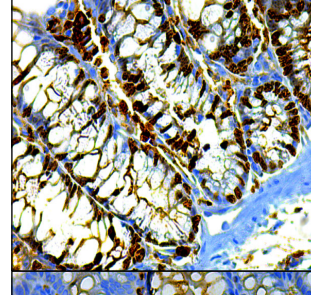

G

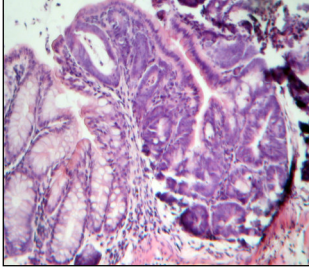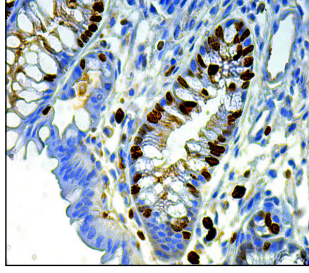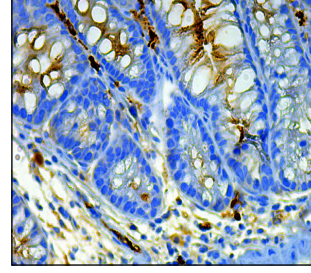

Supplement: jcav07p1632s1.pdf [file jcav07p1632s1.pdf]
